# Supplementary material for: Cryptosporidium Oocyst Contamination in Drinking Water: A Case Study in Italy
Source: MDPI journal article supplement (doi:10.3390/ijerph16112055), 2019-06-10
Supplement: s1 [file s1]

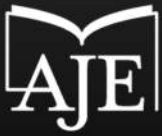

# EDITORIAL CERTIFICATE

This document certifies that the manuscript listed below was edited for proper English language, grammar, punctuation, spelling, and overall style by one or more of the highly qualified native English speaking editors at American Journal Experts.

## Manuscript title:

Cryptosporidium oocyst contamination in drinking water: a case study in Italy.

## Authors:

Cristina Pignata, Silvia Bonetta, Sara Bonetta, Simone M. Cacciò, Anna R. Sannella, Giorgio Gilli, Elisabetta Carraro

## Date Issued:

May 14, 2019

## Certificate Verification Key:

17C9-D206-372F-48C2-446D

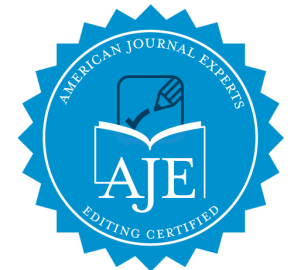

This certificate may be verified at [www.aje.com/certificate](http://www.aje.com/certificate). This document certifies that the manuscript listed above was edited for proper English language, grammar, punctuation, spelling, and overall style by one or more of the highly qualified native English speaking editors at American Journal Experts. Neither the research content nor the authors' intentions were altered in any way during the editing process. Documents receiving this certification should be English-ready for publication; however, the author has the ability to accept or reject our suggestions and changes. To verify the final AJE edited version, please visit our verification page. If you have any questions or concerns about this edited document, please contact American Journal Experts at [support@aje.com](mailto:support@aje.com).
